1                                      Genome size evolution in the beetle genus *Diabrotica*.

2    Dimpal Lata<sup>1</sup>, Brad S Coates<sup>2</sup>, Kimberly K O Walden<sup>3</sup>, Hugh M Robertson<sup>3</sup> and

3    Nicholas J Miller<sup>1\*</sup>

4

5    1. Department of Biological Sciences, Illinois Institute of Technology, Chicago, Illinois,  
6    USA.

7    2. USDA-ARS, Corn Insects & Crop Genetics Research Unit, Ames, Iowa, USA.

8    3. Department of Entomology, University of Illinois at Urbana-Champaign, Urbana,  
9    Illinois USA.

10   \*Correspondence: Nicholas J Miller, 298 R A Pritzker Science Center 3101 S Dearborn  
11   St, Chicago, Illinois 60616, [nmiller11@iit.edu](mailto:nmiller11@iit.edu), +1 312 567 3288.

12

13    **Abstract**

14    Diabrotica corn rootworms are one of the most economically significant pests of maize  
15    in the United States and Europe and an emerging model for insect-plant interactions.  
16    Genome sizes of several species in the genus *Diabrotica* were estimated using flow  
17    cytometry along with that of *Acalymma vittatum* as an outgroup. Within the *Diabrotica*  
18    subgroups fucata and virgifera, genome sizes ranged between 1.59 - 1.68 gigabase  
19    pairs (Gb) and between 2.31- 2.65 Gb, respectively, and the *Acalymma vittatum*  
20    genome size was around 1.69 Gb. This result indicated that a substantial increase in  
21    genome size occurred in the ancestor of the virgifera group. Further analysis of fucata  
22    group and virgifera group genome sequencing reads indicated that the genome size  
23    difference between the *Diabrotica* subgroups could be attributed to a higher content of

24 transposable elements, mostly miniature inverted-transposable elements (MITEs) and  
25 gypsy-like long terminal repeat (LTR) retroelements.

26

## 27 **Introduction**

28 The family Chrysomelidae is one of the largest families of phytophagous beetles (Order:  
29 Coleoptera), with nearly 40,000 species. A large number of species are important  
30 agricultural and forestry pests causing negative economic impacts (Reid, 1995; Nie et  
31 al., 2020). A subtribe of Chrysomelidae, Diabroticina includes important agricultural  
32 pests from the genera *Acalymma*, *Cerotoma*, and *Diabrotica* (Toepfer et al., 2009).  
33 Many species of the genus *Acalymma* are specialists on Cucurbitaceae, with *Acalymma*  
34 *vittatum*, the striped cucumber beetle, being one of the key pests of cucurbits in the  
35 northeastern United States (Lewis et al., 1990). The bean leaf beetle, *Cerotoma*  
36 *trifurcata*, is an important pest of leguminous crops such as peas and soybeans  
37 throughout the eastern USA (Koch et al., 2004). *Diabrotica*, the most diverse genus  
38 (Eben & Espinosa de los Monteros, 2013), is among the most destructive insect pests  
39 impacting US agriculture. *Diabrotica spp.* are divided into three groups: *signifera*, *fucata*,  
40 and *virgifera*, with the latter two containing recognized pest species (Krysan, 1986). The  
41 species in the *fucata* group are multivoltine and polyphagous, while species in the  
42 *virgifera* group are univoltine and oligophagous (Branson & Krysan, 1981; Krysan,  
43 1982). *Diabrotica undecimpunctata* (southern corn rootworm) within the *fucata* group is  
44 a generalist feeder that feeds on several crops, including cucurbits, peanuts, and maize  
45 in the southern USA (Jackson et al., 2005). *Diabrotica virgifera virgifera* (western corn  
46 rootworm), *Diabrotica barberi* (northern corn rootworm), and *Diabrotica virgifera zea*

47 (Mexican corn rootworm) from the *virgifera* group are specialist feeders and are pests of  
48 maize. *Diabrotica virgifera virgifera* is most abundant in the US Corn Belt but is found  
49 throughout much of the United States as well as parts of Canada and Mexico.  
50 *Diabrotica virgifera virgifera* and *D.barberi* are sympatric in the northern part of the US  
51 Corn Belt, while *D. v. zea*, is sympatric with *D. v. virgifera* over part of their range in  
52 Texas, Arizona, and Mexico (Bragard et al., 2019). Diabroticina species show a wide  
53 range of host breadth, from monophagous to polyphagous. It has been found that the  
54 ancestors of Diabroticina were monophagous. The genus *Acalymma* has retained the  
55 ancestral monophagous habit, and the genus *Cerotoma* evolved oligophagy while the  
56 genus *Diabrotica* underwent an increase in diet breadth, shifting from monophagy to  
57 polyphagy. The fucata subgroup has retained the polyphagous characteristic, the  
58 *virgifera* subgroup, on the other hand, has become secondarily oligophagous (Eben &  
59 Espinosa de los Monteros, 2013).

60 As the name “corn rootworm” suggests, these insects cause substantial economic  
61 damage to maize. The western corn rootworm, *Diabrotica virgifera virgifera*, is  
62 considered one of the most destructive pests of maize throughout the US Corn Belt.  
63 More than \$1 billion is spent on its control and lost yield every year (Sappington et al.,  
64 2006). The species has also been introduced into Europe and has become widespread  
65 because of a combination of transatlantic introductions and intra-continental movement  
66 (Ciosi et al., 2008; Miller et al., 2010; Ciosi et al., 2011). *Diabrotica barberi* is a serious  
67 maize pest but is less widespread than *D. v. virgifera* (Capinera, 2008). Although  
68 *D.undecimpunctata* is more widely distributed it is unable to survive the winter  
69 temperatures of the US Corn Belt, and it is considered an occasional pest of maize.

70 Diabroticina pests have repeatedly evolved behavioral and physiological  
71 adaptations to several management strategies like chemical control, crop rotation, and  
72 transgenic maize expressing *Bt* proteins (Levine & Oloumi-Sadeghi, 1991; Toepfer et  
73 al., 2009; Miller et al., 2009; Eben & Espinosa de los Monteros, 2013; Devos et al.,  
74 2013; Gassmann et al., 2014). *Diabrotica virgifera virgifera* evolved resistance to  
75 cyclodiene insecticides during the late 1950s (Ball & Weekman, 1962; Sappington et al.,  
76 2006; Miller et al., 2009), and later to carbamates, the organophosphate methyl-  
77 parathion (Meinke et al., 1998; Miller et al., 2009), and most recently to pyrethroids  
78 (Pereira et al., 2017; Souza et al., 2019; Souza et al., 2020). Both *D. v. virgifera* and *D.*  
79 *barberi* have overcome crop rotation strategies through oviposition behavior (O'Neal et  
80 al., 2002) and extended diapause (Krysan et al., 1984), respectively. Resistance to  
81 transgenic maize expressing Cry3Bb1 and Cry34/35Ab1 proteins has also evolved in *D.*  
82 *v. virgifera* and *D. barberi* (Gassmann et al., 2014; Calles-Torrez et al., 2019).  
83 *Diabrotica virgifera virgifera* has also been shown to be capable of evolving resistance  
84 to RNA interference (RNAi) in the laboratory (Khajuria et al., 2018).

85 Diabroticites have not only evolved resistance to control tactics but have also  
86 evolved tolerance to plant-derived secondary metabolites used by plants to confer a  
87 degree of protection against several insect herbivores. The benzoxazinoid DIMBOA  
88 (2,4-dihydroxy-7-methoxy-1,4-benzoxazin-3-one) is one of the major secondary  
89 metabolites produced by maize plants (Sasai et al., 2009). Cucurbitacins are another  
90 group of bitter secondary metabolites found in the plants of the family Cucurbitaceae  
91 (Rehm & Wessels, 1957). Studies have shown that *D. undecimpunctata* and *D. v.*  
92 *virgifera* from the fucata and virgifera groups of *Diabrotica* can tolerate and sequester

93 the toxic secondary metabolites of plants such as cucurbitacins (Metcalf, 1986; Tallamy  
94 et al., 1998) and DIMBOA (Robert et al., 2017) respectively. Although it has been found  
95 that both these species can tolerate DIMBOA, they respond distinctly to this metabolite.  
96 It was found *D. v. virgifera* gained significantly more dry weight when fed wild-type  
97 plants for 10 days compared to being fed mutant plants, deficient for benzoxazinoid  
98 biosynthesis. However, *D. undecimpunctata* performed equally well when fed on both  
99 types of plants (Alouw & Miller, 2015). The enhanced performance of specialist *D. v.*  
100 *virgifera* may be related to its ability to use DIMBOA as a signal to locate nutritious parts  
101 of roots, while the generalist from the fucata group does not (Robert et al., 2012).  
102 Further, RNA-Seq studies showed transcripts encoding for a CYP9-like cytochrome  
103 P450 monooxygenase were expressed in *D. v. virgifera* larvae feeding on wild type  
104 plants but not in larvae feeding on benzoxazinoid-deficient mutant plants (Miller & Zhao,  
105 2015), suggesting a cytochrome P450 mediated adaptation to benzoxazinoids in *D. v.*  
106 *virgifera*.

107         As several species in the *Diabrotica* genus can cause damage to crops and  
108 adapt to control measures, there has been considerable interest in obtaining sequences  
109 of their genomes and understanding genetic mechanisms for adaptations. Most  
110 *Diabrotica* genetics and genomics research so far has been concentrated on *D. v.*  
111 *virgifera* (Gray et al., 2009; Miller et al., 2010). The genome of *D. v. virgifera* is one of  
112 the larger genomes among beetles and is estimated to be around 2.58 Gb (Coates et  
113 al., 2012) whereas the average genome size for Coleoptera is 0.76Gb (Schoville et al.,  
114 2018; Gregory, 2021). Sequencing the *D. v. virgifera* genome has posed a challenge.  
115 Increased sizes of eukaryotic genomes are generally attributed to corresponding

116 increased numbers of repetitive DNA elements (Kidwell, 2002), where a large proportion  
117 of repeats are composed of different transposable element (TE) sequences (Kojima,  
118 2019). Eukaryotic transposons are divided into retroelements that propagate by an  
119 RNA intermediate (class I) and DNA elements (class II) that mobilize by a “cut-and-  
120 paste” mechanism (Finnegan, 1989; Wicker et al., 2007).

121 Studies also suggest that the *D. v. virgifera* genome contains a high proportion of  
122 repetitive elements (Coates et al., 2012, 2014). The cadherin gene of *D. v. virgifera* is  
123 approximately 13.3 fold larger than the *Tribolium castaneum* ortholog due to much  
124 larger introns. The presence of numerous MITE-like elements within the cadherin gene  
125 of *D. v. virgifera* indicates that the difference in the gene size is due to the insertion of  
126 transposable elements in the *D. v. virgifera* introns (Coates et al., 2012). Class I BEL-  
127 like long terminal repeat (LTR) retrotransposons have been also found in the *D. v.*  
128 *virgifera* genome (Coates et al., 2014).

129 Although the genome size of *D. v. virgifera* has been reported, no genome size  
130 data have been obtained for the other species in the genus *Diabrotica* and related  
131 genera. Since the genome size of *D. v. virgifera* is relatively large, we hypothesized that  
132 there has been a recent expansion in genome size in the lineage leading to it. We  
133 tested this hypothesis by estimating and comparing the genome sizes of *D. v. virgifera*  
134 with those of several *Diabrotica* species and an outgroup species, *A. vittatum*. As a high  
135 proportion of repetitive elements were found in the cadherin gene of *D. v. virgifera*, we  
136 further hypothesized that genome size expansion in the lineage leading to *D.v. virgifera*  
137 was due to a general increase in repetitive elements. To test this hypothesis we looked

138 at the nature and quantity of repetitive elements in the virgifera group and compared it  
139 with the fucata group.

140

## 141 **Materials and Methods**

### 142 **Sample Collection**

143 Specimens of *D. v. virgifera* and *A. vittatum* were collected from a maize field in Illinois  
144 in 2017, while *D. barberi* were collected from Wisconsin by Tracy Schilder, Wisconsin  
145 Department of Agriculture. Specimens of *D. v. zea* were collected from Texas by  
146 Thomas Sappington, US Department of Agriculture Agricultural Research Service, and  
147 *D. balteata* were provided by Blair Siegfried and Heather McAuslane, University of  
148 Florida, from a laboratory colony. *Diabrotica undecimpunctata* were obtained from Crop  
149 Characteristics (Farmington, Minnesota, USA). Adult *Periplaneta americana*, which  
150 were used as an external reference (Guo et al., 2015; He et al., 2016) for flow  
151 cytometric measurement, were obtained from Carolina Biological Supply (Burlington,  
152 North Carolina, USA). All samples were flash-frozen in liquid nitrogen and preserved at -  
153 80°C.

154

### 155 **Sample Preparation**

156 Genome size estimates were generated for eight individuals from five species of  
157 *Diabrotica* and one species of *Acalymma*. Preparations of nuclei were based on the  
158 method of Hare and Johnston (2012). The heads of single individuals were  
159 homogenized in 1ml of cold Galbraith buffer (4.26 g of MgCl<sub>2</sub>, 8.84 g of sodium citrate,  
160 4.2g of MOPS, 1ml of Triton-x, and 1mg of boiled ribonuclease A into 1 liter of ddH<sub>2</sub>O)

161 placed in a 7ml Kontes Dounce. The homogenate was filtered through a 20  $\mu$ m nylon  
162 mesh in a 1.5ml Eppendorf tube. Nuclei were stained with propidium iodide (PI) at 50  
163  $\mu$ g/ml, in the dark at 4°C for an hour. In addition to the test sample, the brain tissue of *P.*  
164 *americana* was used as a standard (Hanrahan & Johnston, 2011). The brain tissue of *P.*  
165 *americana* was dissected out, and the nuclear suspension was prepared and stained as  
166 described above.

167

### 168 **Flow Cytometric Analysis**

169 Stained nuclei were analyzed using an Attune NxT Flow Cytometer (Thermo Fisher  
170 Scientific, Waltham, Massachusetts). The propidium iodide-stained nuclei were excited  
171 by exposing them to the 488 nm blue laser. Red fluorescence from the propidium iodide  
172 was collected using a 610/20 emission filter in the YL2 detector channel. The calibration  
173 of the flow cytometer was performed using a standard manufacturer's protocol before  
174 use. The samples were inverted and mixed several times to resuspend and then loaded  
175 onto the cytometer for analysis. During each sample run, the linearity of the  
176 fluorescence measurement was confirmed by checking that the mean channel number  
177 of the 4C nuclei (G2 phase) was double that of 2C nuclei (G1 phase). At least 1000  
178 nuclear events were collected under each unknown and standard 2C peak. The nuclei  
179 peak (PI fluorescence histogram) and coefficient of variation (CV) for each peak of  
180 interest (sample and standard) were obtained using the gating function in the Attune  
181 Software. The coefficient of variation (CV) was evaluated and confirmed to be less than  
182 5 percent which is considered appropriate for accurate genome size estimates (Dolezel  
183 et al., 2007; Tomaszewska et al., 2021). The known genome size of the standard



184 (3.41Gb, Harahan & Johnson, 2011) and the relative fluorescence obtained from the  
185 sample and standard were then used to estimate the genome size using the following  
186 formula:

187  $\text{Sample 1C DNA content} = [(\text{sample 2C mean peak position}) / (\text{standards 2C mean}$   
188  $\text{peak position})] * \text{standards 1C}.$

189 Genome size variations were analyzed using analysis of variance (ANOVA) and  
190 Tukey's honest significant difference (HSD) post-hoc analyses using R statistical  
191 software (version: 4.10) (*R Foundation for Statistical Computing, Vienna, Austria.*,  
192 2020). Letters were assigned showing significance based on Tukey HSD post-hoc test  
193 using R statistical software (version: 4.10) (R Core Team 2021).

194

## 195 **Sequencing Data**

196 Data from Illumina whole-genome shotgun sequencing were used to analyze the  
197 repetitive DNA content of *D. barberi*, *D. undecimpunctata*, and *D. v. virgifera*. Adult *D.*  
198 *barberi* ( $n = 71$ ) and *D. undecimpunctata* ( $n = 50$ ) were collected from maize fields near  
199 Ames, Iowa, and Monmouth, Illinois, respectively. Each sample was pooled by species,  
200 flash-frozen in liquid nitrogen and ground in liquid nitrogen, and then DNA extracted  
201 from ~3.0 mg of tissue using the Qiagen DNeasy Blood and Tissue Extraction kit, with  
202 modifications as described (Coates et al., 2014). Two micrograms of extracted DNA  
203 was submitted to the Iowa State University DNA Facility (Ames, IA, USA) from which  
204 ~500bp insert indexed sequencing libraries were generated using the Illumina TruSeq  
205 v2 Library Construction Kit (Illumina, San Diego, CA). Single-end 100-bp reads were  
206 generated from *D. barberi* and *D. undecimpunctata* libraries in separate lanes of an

207 Illumina HiSeq2500. Raw reads were submitted to the Biotechnology Information  
208 (NCBI) Short Read Archive (SRA) under accessions SRR13363759 and SRR13364002  
209 for *D. barberi* and *D. undecimpunctata*, respectively.

210 *Diabrotica virgifera virgifera* adult females of inbred line Ped12-6-A-3 were flash-frozen  
211 prior to genomic DNA isolation. Briefly, whole beetles were homogenized in an SDS-  
212 based cell lysis solution followed by overnight incubation with Proteinase K at 55°C.  
213 Cellular debris was pelleted and RNA was digested with RNaseA. The homogenate was  
214 mixed with a high-salt solution and incubated overnight at 4°C. The DNA in the  
215 supernatant was precipitated overnight with ethanol at -20°C. DNA was quantified on an  
216 Invitrogen Qubit. A paired-end short-insert genomic DNA library was prepared at the  
217 Roy J. Carver Biotechnology Center at the University of Illinois at Urbana-Champaign  
218 using an Illumina TruSeq DNaseq Sample Prep kit. Reads were sequenced to 100bp  
219 with the Illumina TruSeq SBS sequencing kit version 3 on an Illumina HiSeq 2000  
220 instrument using Casava 1.8 for basecalling.

221 Sequencing generated 90 million single-end reads of 100bp for *D. barberi*, 118 million  
222 single-end reads of 100bp for *D.undecimpunctata*, and 116 million 100-bp paired-end  
223 reads for *D. v. virgifera*.

224

## 225 **Annotation and Quantification of Repeat Content**

226 Raw reads were quality-filtered using fastp software (version 0.20.1) with a minimum 20  
227 average Phred score. Reads mapping to mitochondrial genome sequences of  
228 *Diabrotica* species available through the NCBI website (KF658070.1, KF669870.1) were  
229 identified (minimap2 v2.17) and filtered out as implemented in the SSRG workflow

230 (Pombert, 2021). Repetitive elements in the genomes of *D.undecimpunctata*, *D. barberi*,  
231 and *D. v. virgifera* were assembled and quantified using dnaPipeTE v1.3 (Goubert et al.,  
232 2015) and annotated using the DeepTE tool (Yan et al., 2020). To quantify the  
233 proportion of TEs, dnaPipeTE uses samples of sequence reads instead of genome  
234 assemblies, making this pipeline (dnaPipeTE) applicable for genomes with lower  
235 sequencing depth. The pipeline performed assembly of repetitive reads into contigs  
236 from low coverage sampling of raw reads using Trinity (Grabherr et al., 2011) and  
237 annotated them using RepeatMasker (Smit et al., 1996-2004) with built-in Repbase  
238 libraries (Bao et al., 2015, version 2017-01-27). Quantification was done by mapping a  
239 random sample of reads onto the assembled repeats. The parameters set as the  
240 benchmark for repeat content analysis for genomes greater than 500Mb (Goubert et al.,  
241 2015), including the coverage parameter, were used to run dnaPipeTE. The pipeline  
242 was run for all three species using 0.1x coverage. Additionally, 0.1x coverage was  
243 chosen based on the high N50 metric and plateauing point of transposable elements i.e.,  
244 increasing the coverage beyond 0.1x only marginally increased the proportion of  
245 transposable elements for all three species. The dnaPipeTE pipeline does not annotate  
246 novel repeats that do not match an entry in the included Repbase library. A high  
247 proportion of repeats from each of the three beetle species were not annotated by  
248 dnaPipeTE. DeepTE, a deep learning method based on convolutional neural networks,  
249 was used to classify and annotate the unknown TEs. DeepTE uses eight trained models  
250 to classify TEs into superfamilies and orders. All the TE contigs assembled by  
251 dnaPipeTE were analyzed using DeepTE, whether or not they had been previously  
252 classified by dnaPipeTE. Combining the results of the assembly and quantification by

253 dnaPipeTE with the classification results from DeepTE allowed the abundance of repeat  
254 families in the genomes of all three species to be determined.

255 For comparison with the dnaPipeTE *de-novo* assembly of repetitive elements, the  
256 percentage of repetitive elements in the *D. v. virgifera* genome assembly (NCBI RefSeq  
257 accession GCF\_003013835.1) was analyzed with RepeatModeler version 2.0.1 (Flynn  
258 et al., 2019). Repeatmodeler is a *de-novo* transposable element identification package  
259 that uses three repeat finding programs (RECON, RepeatScout, and  
260 LtrHarvest/Ltr\_retriever) to discover repetitive DNA sequences in the genome. These  
261 repetitive DNA sequences were annotated by repeatClassifier based on the similarity to  
262 RepBase and Dfam databases. The annotated library produced was used as input to  
263 RepeatMasker to detect and mask repeats in the genome. Default parameters were  
264 used to run RepeatModeler.

265

## 266 **Results**

### 267 **Genome size from flow cytometry:**

268 The genome sizes of *D. v. zaeae*, *D. v. virgifera*, and *D. barberi* from the *virgifera* group  
269 were estimated to be 2.65Gb  $\pm$  0.01, 2.64 Gb  $\pm$  0.02, and 2.31Gb  $\pm$  0.04, respectively.

270 The genomes of *D. balteata* and *D.undecimpunctata* from the *fucata* group were  
271 estimated at 1.68Gb  $\pm$  0.01 and 1.59 Gb  $\pm$  0.00. The outgroup species *A. vittatum*  
272 genome size is estimated to be 1.69 Gb  $\pm$  0.01. An analysis of variance (ANOVA)  
273 showed a significant difference ( $p < 2 \times 10^{-16}$ ) in the genome sizes of the species  
274 under study. A subsequent Tukey HSD test showed that there were no significant  
275 differences in genome size between *D. v. virgifera* and *D. v. zaeae*, between *D. balteata*

276 and *D.undecimpunctata*, or between *D. balteata* and *A. vittatum*. The estimated genome  
277 size for each species with their phylogenetic relationships is shown in Figure I.

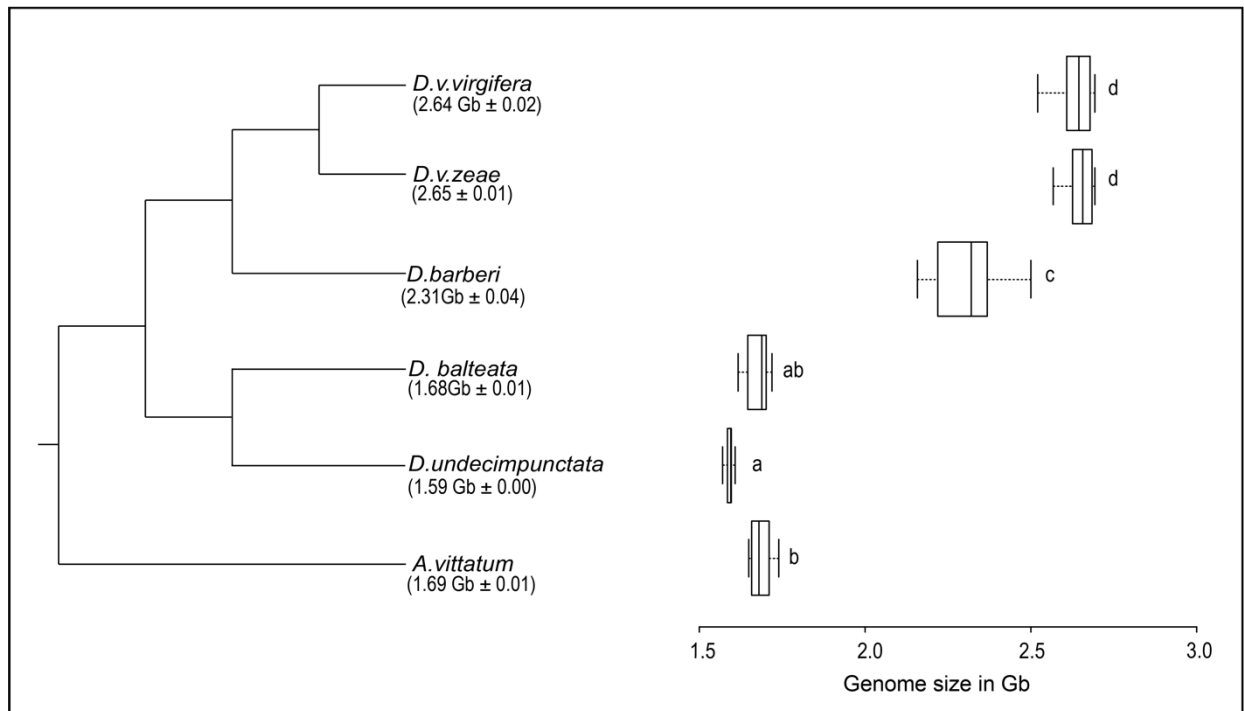

278  
279 Figure I: Genome size evolution within the genus *Diabrotica*. Phylogeny of *Diabrotica* and outgroup  
280 *Acalymma vittatum* is based on Eben & Espinosa de los Monteros, 2013. Letters a - d indicate groups  
281 with no significant difference in mean 1C-value (Tukey HSD;  $\alpha = 0.05$ ).

282

### 283 Repeat Content analysis:

284 The repeatomes of *D. v. virgifera*, *D. barberi*, and *D. undecimpunctata* comprised 72.5%,  
285 70.4%, and 52.7% of their genomes, respectively. The repeat content obtained via  
286 Repeat Modeler for the draft *D. v. virgifera* genome was 57.4%. As the assembly of the  
287 *D. v. virgifera* genome was based on short-reads, TEs were expected to be under-  
288 represented because of the difficulty of assembling individual copies. TE-rich large  
289 genomes are difficult to assemble and often end up with high levels of fragmentation  
290 around repetitive regions leading to underestimation of TE content (Green, 2002).

291 To further investigate the classes of repeat families that contributed to the genome size  
292 variation between the two groups of *Diabrotica*, the DeepTE annotations were coupled  
293 with the dnaPipeTE abundance quantification to estimate the abundance of different  
294 repeat elements in the genomes of *D. v. virgifera*, *D.barberi*, and *D.undecimpunctata*.  
295 The TEs that accounted for most of the difference in the genome size of the two groups  
296 were annotated as class II DNA Tc1-mariner Miniature-repeat Transposable Elements  
297 (MITEs) (ClassII\_DNA\_TcMar\_MITE) and class II DNA hAT MITE  
298 (ClassII\_DNA\_hAT\_MITE) of transposable elements and class I long terminal repeat  
299 (LTR) Gypsy (ClassI\_LTR\_Gypsy) transposable elements (Figure II). The *D. v. virgifera*  
300 genome contained a large amount of ClassII\_DNA\_TcMar\_MITE(0.62 Gb),  
301 ClassII\_DNA\_hAT\_MITE (0.24 Gb), and ClassI\_LTR\_Gypsy(0.31 Gb). Similarly, *D.*  
302 *barberi* also had a high amount of ClassII\_DNA\_TcMar\_MITE(0.53 Gb),  
303 ClassII\_DNA\_hAT\_MITE (0.19 Gb), and ClassI\_LTR\_Gypsy(0.26 Gb). The *D.*  
304 *undecimpunctata* had a lower amount of ClassII\_DNA\_TcMar\_MITE(0.16 Gb),  
305 ClassII\_DNA\_hAT\_MITE (0.06 Gb), and ClassI\_LTR\_Gypsy(0.17 Gb). Transposable  
306 elements from other repeat families such as nLTRS, helitrons, and others from class I  
307 and class II DNA elements were not as prominent as those mentioned above. Single-  
308 low copy sequences representing the non-repetitive portion of the genomes of *D. v.*  
309 *virgifera*, *D.barberi*, and *D.undecimpunctata* totaled 0.73 Gb, 0.68 Gb, and 0.75 Gb,  
310 respectively.

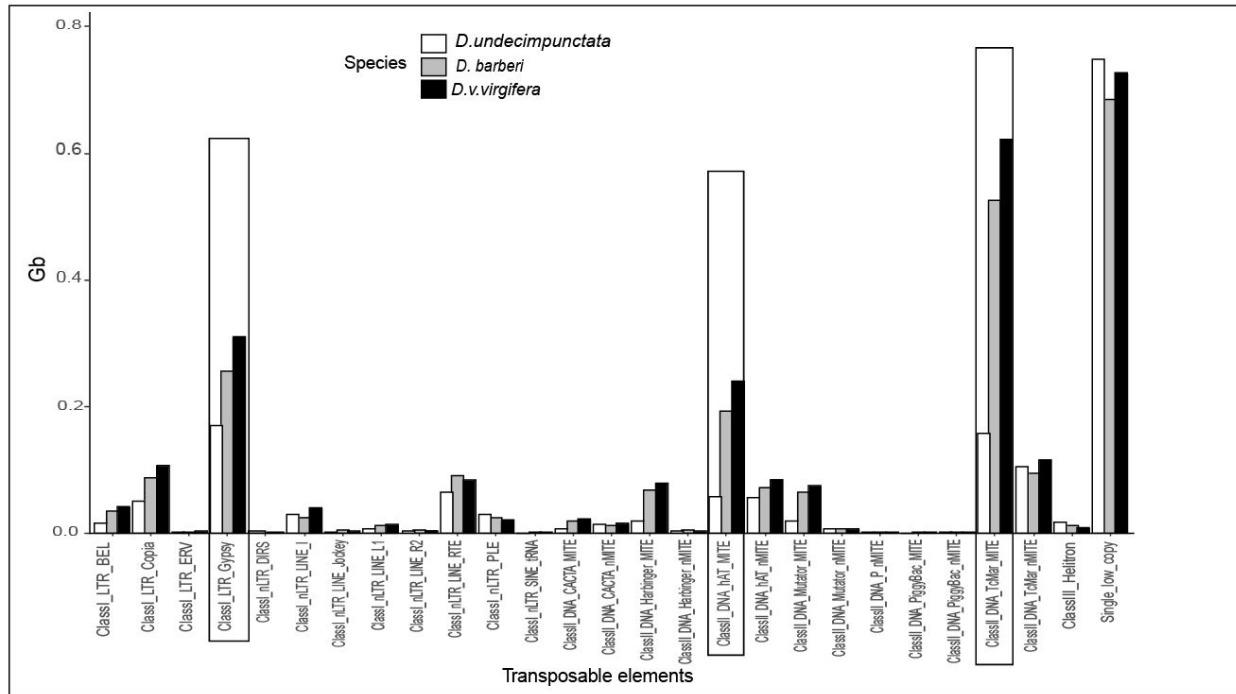

311

312 Figure II: Quantities of transposable elements present in the genomes of three species of *Diabrotica*. The  
 313 boxed transposable elements are those with high contributions to the genome size variation between the  
 314 groups of fucata and virgifera.

315

### 316 **Discussion:**

317 *Diabrotica* is the most diverse genus within the subtribe Diabroticina and includes 354  
 318 species native to America. Only species from the fucata and virgifera groups occur in  
 319 the United States (Krysan, 1986), while species from the signifera group are endemic to  
 320 South America. The economically significant pest species in this genus either belong to  
 321 the virgifera group or to the fucata group, justifying the need to study them  
 322 comprehensively. The signifera group species are not of economic importance, and  
 323 their biology is also mostly unknown (Clark et al., 2001) and so the group is  
 324 understudied. The expansion and adaptability of the pest species generates a sense of  
 325 urgency to study them.

326 Our results demonstrated that the genome size of virgifera group species are  
327 approximately 1Gb larger than that of the fucata group and *Acalymma* species. The  
328 genome size for *D. v. virgifera* obtained in this study and in a previous study (Coates et  
329 al., 2012) are consistent. Our genome size results, when coupled with the species'  
330 phylogenetic relationship, indicated that an expansion in genome size occurred in the  
331 common ancestor of the virgifera group leading to *D. barberi*, *D. v. virgifera*, and *D. v.*  
332 *zeae*. There was also a significant difference in the genome sizes of *D. barberi* and *D.*  
333 *virgifera subsp.* suggesting a possible further expansion of the genome size in the  
334 common ancestor of *D. v. virgifera* and *D. v. zeae*.

335 The estimated divergence time between *Acalymma* and *Diabrotica* species and  
336 between the *Diabrotica* species group was dated at 45 million years ago (Mya) and 31  
337 Mya respectively. Another radiation within the *Diabrotica* genus took place around 17  
338 Mya resulting in virgifera group (Eben & Espinosa de los Monteros, 2013). Repeat  
339 elements of species from fucata and virgifera were studied to understand the basis of  
340 genome size expansion in *Diabrotica*. The genomes of the virgifera and fucata group of  
341 *Diabrotica* species contained many common TEs, but the abundance of three TE  
342 families differed substantially and accounted for much of the difference in genome size  
343 between the two groups and also within the virgifera group between *D. barberi* and *D.*  
344 *virgifera subsp.* The MITE-like Tc1-mariner and hAT elements and LTR Gypsy  
345 retroelements were more abundant in the virgifera group. Miniature-repeat  
346 Transposable Elements (MITEs) are short AT-rich (<0.5kb) derivatives of DNA elements  
347 whose internal sequence lacks an open reading frame (Lu et al., 2012), contain  
348 conserved terminal inverted repeats, are flanked by target site duplications, and are



349 closely associated with euchromatic genes (Kuang et al., 2009). Gypsy elements are  
350 one of the most abundant classes of the long terminal repeat (LTR)-retrotransposons  
351 superfamily with large numbers of copies found in almost all the plants, animals, and  
352 fungi tested (Thomas-Bulle et al., 2018). Generally, class I transposable elements have  
353 been reported to be in high abundance in insect genomes, such as *Tribolium*  
354 *castaneum* (Wang et al., 2008), *Drosophila* (Clark et al., 2007), *Bombyx mori* (Osanai-  
355 Futahashi et al., 2008) in comparison to class II elements. However, in *Diabrotica*, we  
356 discovered an abundance of class II elements and, to some extent, class I elements.

357 Genome size varies enormously among eukaryote species (Hidalgo et al., 2017), and  
358 among beetles in the Family Chrysomelidae (Hanrahan & Johnston, 2011; Petitpierre et  
359 al., 1993). There are studies showing a positive correlation between genome size and  
360 phenotypic traits such as body size in groups of invertebrates, including aphids (Finston  
361 et al., 1995) and flies (Ferrari & Rai, 1989). Equally, there are studies showing negative  
362 correlations between phenotypic traits and genome sizes, such as the relation between  
363 body size and genome size for the *Pimelia* and *Phylan* genera in the beetle family  
364 Tenebrionidae (Palmer et al., 2003; Palmer & Petitpierre, 1996). Cases of negative  
365 correlation of genome size with pupal development have been reported in ladybird  
366 beetles and with the overall development rate in *Tribolium* (Carreras et al., 1991;  
367 Gregory et al., 2003). It has been previously hypothesized that genome size negatively  
368 correlates with the host range in insect herbivores (Zhang et al., 2019). However, there  
369 are also studies showing that genome size may be positively correlated with the host  
370 range in insect herbivores (Matsubayashi & Ohshima, 2015; Calatayud et al., 2016).

371 This contradiction in results, along with our data suggests that the genome size may not  
372 be related directly to the host range.

373 Comparative genomic studies in insects have revealed that repeat elements can make  
374 large contributions to genome size variation. Variation in TE abundance can be seen  
375 both within and among species (Lynch, 2007). Honeybees, with a genome size of  
376 230Mb, show very few repeat elements, representing a case of TE extinction  
377 (Weinstock et al., 2006). Similarly, the small genome of *Belgica antarctica*, the Antarctic  
378 midge, (99 Mb) is also due to the reduction of repeats in the genome (Kelley et al.,  
379 2014). There are also cases of TE proliferations, such as in *Locusta migratoria*, that led  
380 to its large genome size of 6.5 Gb (Wang et al., 2014). Cases of increase in genome  
381 size as a consequence of transposable elements have also been reported in wood  
382 white (Leptidea) butterflies and North American fireflies (Lampyridae) (Talla et al., 2017;  
383 Lower et al., 2017). This further suggests that genome size in insects is fairly plastic and  
384 largely driven by the loss and gain of transposable elements.

385 Host genomes have employed several mechanisms to suppress transposable  
386 element expression and mobility (Bourque et al., 2018) which includes epigenetic  
387 silencing either through histone modifications or DNA methylation, targeted  
388 mutagenesis, small RNA interference, as well as sequence-specific repressors such as  
389 the recently profiled KRAB zinc-finger proteins (Fouché et al., 2020; Maupetit-Mehouas  
390 & Vaury, 2020). At the same time, some transposable elements have evolved regulatory  
391 sequences controlling their own copy number to autonomously replicate in the genome  
392 (Lohe & Hartl, 1996; Saha et al., 2015). TE de-repression is triggered by environmental  
393 stimuli, in particular stress (Bundo et al., 2014; Fouché et al., 2020; Voronova et al.,

394 2014) impacting transcription levels and increasing transpositional activity (Dubin et al.,  
395 2018). Additionally, there are other factors influencing TE mobilization for example  
396 demethylation and the removal of repressive histone marks during epigenetic  
397 reprogramming stages (Russell & LaMarre, 2018)

398 Transposable elements are a major component of many eukaryotic genomes and  
399 have been associated with several mechanisms shaping eukaryotic genome function,  
400 structure, and evolution (Charlesworth & Charlesworth, 1983; Chuong et al., 2017).  
401 These transposons are capable of changing position within the genome, leading to  
402 mutations by inserting themselves into functional regions and causing change by either  
403 modifying or eliminating gene expression (Feschotte, 2008; Oliver & Greene, 2009). TE  
404 integration and excision can introduce novel variation at the individual and population-  
405 scale (McClintock, 1950; Wendel & Wessler, 2000) introducing phenotypic modifications  
406 through changes in epigenetic mechanisms and providing genetic motifs (Jiang et al.,  
407 2004; Kapitonov & Jurka, 2007; Stuart et al., 2016; Wessler et al., 1995). They may also  
408 lead to genomic rearrangement (Maumus et al., 2015; Mat Razali et al., 2019). In  
409 particular, MITEs and LTR retrotransposon have played an essential role in shaping  
410 gene structure and altering gene function (Wessler et al., 1995).

411 Initially, MITEs were found as key components of plant genomes, as they are  
412 frequently associated with genes with high copy numbers indicating a possible role in  
413 gene expression and genome evolution (Santiago et al., 2002; Oki et al., 2008). They  
414 are also found in animals including mosquitoes, *Drosophila*, fish, and humans (Deprá et  
415 al., 2012). Similar to MITEs, LTR retrotransposons were also first discovered in plants.  
416 They are usually located largely in intergenic regions and are often the single largest

417 component of plant genomes (Feschotte et al., 2002; Kumar & Bennetzen, 1999).  
418 Previous studies have also revealed that both MITES and LTR retrotransposons can  
419 regulate downstream gene expression by inserting into promoter regions (Wang et al.,  
420 2017; Butelli et al., 2012; Liu et al., 2019).

421       Mostly, TE insertions are presumed to be deleterious or neutral, but some have  
422 been shown to be selectively advantageous. There are several studies showing that TE-  
423 mediated insertions have led to insecticide resistance. In pink bollworm *Pectinophora*  
424 *gossypiella*, a major pest of cotton (Rostant et al., 2012), several independent TE  
425 insertions in the *PgCad1* gene conferred resistance to *Bt* Cry1Ac toxin (Fabrick et al.,  
426 2011; Wang et al., 2019). Cases of resistance to *Bacillus thuringiensis* (Bt) toxins have  
427 also been reported in *Heliothis virescens* which is caused by disruption of a cadherin-  
428 superfamily gene by TE insertion (Gahan, 2001). TE insertions in xenobiotic metabolism  
429 related genes such as those encoding cytochrome P450 monooxygenases and  
430 glutathione S-transferases in *Helicoverpa armigera* are the cause of resistance to  
431 insecticides (Klai et al., 2020). Another example demonstrating that TEs can produce  
432 adaptive mutations has been reported in *D. melanogaster* (Rostant et al., 2012; Gilbert  
433 et al., 2021). An increased resistance to dichlorodiphenyltrichloroethane (DDT) in *D.*  
434 *melanogaster* has been reported due to Cyp6g1 upregulation caused by insertion of the  
435 Accord transposon in the 5' regulatory region of the Cyp6g1 gene (Chung et al., 2007).  
436 Similarly, TE insertion, which truncates the CHKov1 gene in *D. melanogaster*, confers  
437 resistance towards organophosphate (Aminetzach, 2005).

438 The role played by TEs, if any, in Diabroticina evolution, both long term such as  
439 speciation and host plant shifts, and in recent evolution, such as their adaptation to pest

440 management, is unknown. However, the ongoing effort of the United States Department  
441 of Agriculture Agricultural Research Service (USDA-ARS) Ag100Pest initiative to  
442 sequence other species of *Diabrotica* may help us understand and answer these  
443 questions.

#### 444 **Acknowledgments:**

445 We would like to thank Dr. Thomas Sappington, Dr. Blair Siegfried, Dr. Heather  
446 McAuslane, and Tracy Schilder for providing insect samples. We also thank Dr. J.  
447 Spencer Johnston and David Leclerc for their advice and guidance on flow cytometry  
448 methods and Dr. Clément Goubert's advice on dnaPipeTE. This work was supported  
449 and funded by USDA NIFA award number 2011-67009-30134 and by the USDA  
450 Agricultural Research Service (ARS) (CRIS Project 5030-22000-019-00D). This article  
451 reports the results of research only, and mention of any commercial product or service  
452 does not constitute a recommendation for its use by USDA. The findings and  
453 conclusions in this publication are those of the authors and should not be construed to  
454 represent any official USDA or United States government determination of policy.  
455 USDA is an equal opportunity employer and provider.

#### 456 **References:**

457 Alouw, J. C., & Miller, N. J. (2015). Effects of benzoxazinoids on specialist and  
458 generalist *Diabrotica* species. *Journal of Applied Entomology*, 139(6), 424–431.  
459 <https://doi.org/10.1111/jen.12194>

460 Aminetzach, Y. T. (2005). Pesticide resistance via transposition-mediated adaptive

- 461 gene truncation in *Drosophila*. *Science*, 309(5735), 764–767.
- 462 <https://doi.org/10.1126/science.1112699>
- 463 Ball, H. J., & Weekman, G. T. (1962). Insecticide resistance in the adult western corn  
464 rootworm in Nebraska. *Journal of Economic Entomology*, 55(4), 439–441.
- 465 <https://doi.org/10.1093/jee/55.4.439>
- 466 Bao, W., Kojima, K. K., & Kohany, O. (2015). Repbase Update, a database of repetitive  
467 elements in eukaryotic genomes. *Mobile DNA*, 6(1), 11.
- 468 <https://doi.org/10.1186/s13100-015-0041-9>
- 469 Bourque, G., Burns, K. H., Gehring, M., Gorbunova, V., Seluanov, A., Hammell, M.,  
470 Imbeault, M., Izsvák, Z., Levin, H. L., Macfarlan, T. S., Mager, D. L., & Feschotte,  
471 C. (2018). Ten things you should know about transposable elements. *Genome*  
472 *Biology*, 19, 199. <https://doi.org/10.1186/s13059-018-1577-z>
- 473 Bragard, C., Dehnen-Schmutz, K., Di Serio, F., Gonthier, P., Jacques, M., Jaques Miret,  
474 J. A., Justesen, A. F., Magnusson, C. S., Milonas, P., Navas-Cortes, J. A.,  
475 Parnell, S., Potting, R., Reignault, P. L., Thulke, H., Van der Werf, W., Vicent  
476 Civera, A., Yuen, J., Zappalà, L., Czwieniczek, E., & MacLeod, A. (2019). Pest  
477 categorisation of *Diabrotica virgifera zea* . *EFSA Journal*, 17(11).
- 478 <https://doi.org/10.2903/j.efsa.2019.5858>
- 479 Branson, T. F., & Krysan, J. L. (1981). Feeding and oviposition behavior and life cycle  
480 strategies of *Diabrotica* : An evolutionary view with implications for pest  
481 management. *Environmental Entomology*, 10(6), 826–831.
- 482 <https://doi.org/10.1093/ee/10.6.826>
- 483 Bundo, M., Toyoshima, M., Okada, Y., Akamatsu, W., Ueda, J., Nemoto-Miyauchi, T.,

484 Sunaga, F., Toritsuka, M., Ikawa, D., Kakita, A., Kato, M., Kasai, K., Kishimoto,  
485 T., Nawa, H., Okano, H., Yoshikawa, T., Kato, T., & Iwamoto, K. (2014).  
486 Increased L1 retrotransposition in the neuronal genome in schizophrenia.  
487 *Neuron*, 81(2), 306–313. <https://doi.org/10.1016/j.neuron.2013.10.053>

488 Butelli, E., Licciardello, C., Zhang, Y., Liu, J., Mackay, S., Bailey, P., Reforgiato-  
489 Recupero, G., & Martin, C. (2012). Retrotransposons control fruit-specific, cold-  
490 dependent accumulation of anthocyanins in blood oranges. *The Plant Cell*, 24(3),  
491 1242–1255. <https://doi.org/10.1105/tpc.111.095232>

492 Calatayud, P.-A., Petit, C., Burlet, N., Dupas, S., Glaser, N., Capdevielle-Dulac, C., Le  
493 Ru, B., Jacquin-Joly, E., Kaiser-Arnauld, L., Harry, M., & Vieira, C. (2016). Is  
494 genome size of Lepidoptera linked to host plant range? *Entomologia*  
495 *Experimentalis et Applicata*, 159(3), 354–361. <https://doi.org/10.1111/eea.12446>

496 Calles-Torrez, V., Knodel, J. J., Boetel, M. A., French, B. W., Fuller, B. W., & Ransom,  
497 J. K. (2019). Field-evolved resistance of northern and western corn rootworm  
498 (Coleoptera: Chrysomelidae) populations to corn hybrids expressing single and  
499 pyramided Cry3Bb1 and Cry34/35Ab1 Bt proteins in North Dakota. *Journal of*  
500 *Economic Entomology*, 112(4), 1875–1886. <https://doi.org/10.1093/jee/toz111>

501 Capinera, J. L. (2008). Northern corn rootworm, *Diabrotica barberi* Smith & Lawrence  
502 (Coleoptera: Chrysomelidae). In J. L. Capinera (Ed.), *Encyclopedia of*  
503 *Entomology* (pp. 2616–2619). Springer Netherlands. [https://doi.org/10.1007/978-](https://doi.org/10.1007/978-1-4020-6359-6_2242)  
504 [1-4020-6359-6\\_2242](https://doi.org/10.1007/978-1-4020-6359-6_2242)

505 Carreras, I., A., A.-F., Juan, C., & Petitpierre, E. (1991). Tasa de desarrollo en *Tribolium*  
506 *brevicornis* (Coleoptera: Tenebrionidae) y su relación con el tamaño del genoma.



- 507 Charlesworth, B., & Charlesworth, D. (1983). The population dynamics of transposable  
508 elements. *Genetics Research*, 42(1), 1–27.  
509 <https://doi.org/10.1017/S0016672300021455>
- 510 Chung, H., Bogwitz, M. R., McCart, C., Andrianopoulos, A., Ffrench-Constant, R. H.,  
511 Batterham, P., & Daborn, P. J. (2007). *Cis*-regulatory elements in the *Accord*  
512 retrotransposon result in tissue-specific expression of the *Drosophila*  
513 *melanogaster* insecticide resistance gene *Cyp6g1*. *Genetics*, 175(3), 1071–1077.  
514 <https://doi.org/10.1534/genetics.106.066597>
- 515 Chuong, E. B., Elde, N. C., & Feschotte, C. (2017). Regulatory activities of transposable  
516 elements: From conflicts to benefits. *Nature Reviews. Genetics*, 18(2), 71–86.  
517 <https://doi.org/10.1038/nrg.2016.139>
- 518 Ciosi, M., Miller, N. J., Kim, K. S., Giordano, R., Estoup, A., & Guillemaud, T. (2008).  
519 Invasion of Europe by the western corn rootworm, *Diabrotica virgifera virgifera*:  
520 Multiple transatlantic introductions with various reductions of genetic diversity.  
521 *Molecular Ecology*, 17(16), 3614--3627. [https://doi.org/10.1111/j.1365-](https://doi.org/10.1111/j.1365-294X.2008.03866.x)  
522 [294X.2008.03866.x](https://doi.org/10.1111/j.1365-294X.2008.03866.x)
- 523 Ciosi, M., Miller, N. J., Toepfer, S., Estoup, A., & Guillemaud, T. (2011). Stratified  
524 dispersal and increasing genetic variation during the invasion of Central Europe  
525 by the western corn rootworm, *Diabrotica virgifera virgifera*. *Evolutionary*  
526 *Applications*, 4(1), 54–70. <https://doi.org/10.1111/j.1752-4571.2010.00133.x>
- 527 Clark, A. G., Eisen, M. B., Smith, D. R., Bergman, C. M., Oliver, B., Markow, T. A.,  
528 Kaufman, T. C., Kellis, M., Gelbart, W., Iyer, V. N., Pollard, D. A., Sackton, T. B.,  
529 Larracuenta, A. M., Singh, N. D., Abad, J. P., Abt, D. N., Adryan, B., Aguade, M.,



- 530 Akashi, H., ... \*Broad Institute Genome Sequencing Platform. (2007). Evolution  
531 of genes and genomes on the *Drosophila* phylogeny. *Nature*, 450(7167), 203–  
532 218. <https://doi.org/10.1038/nature06341>
- 533 Clark, T. L., Meinke, L. J., & Foster, J. E. (2001). Molecular phylogeny of *Diabrotica*  
534 beetles (Coleoptera: Chrysomelidae) inferred from analysis of combined  
535 mitochondrial and nuclear DNA sequences. *Insect Molecular Biology*, 10(4),  
536 303–314. <https://doi.org/10.1046/j.0962-1075.2001.00269.x>
- 537 Coates, B. S., Alves, A. P., Wang, H., Walden, K. K. O., French, B. W., Miller, N. J.,  
538 Abel, C. A., Robertson, H. M., Sappington, T. W., & Siegfried, B. D. (2012).  
539 Distribution of genes and repetitive elements in the *Diabrotica virgifera virgifera*  
540 genome estimated using BAC sequencing. *Journal of Biomedicine and*  
541 *Biotechnology*, 2012, 1–9. <https://doi.org/10.1155/2012/604076>
- 542 Coates, B. S., Fraser, L. M., French, B. W., & Sappington, T. W. (2014). Proliferation  
543 and copy number variation of BEL-like long terminal repeat retrotransposons  
544 within the *Diabrotica virgifera virgifera* genome. *Gene*, 534(2), 362–370.
- 545 Deprá, M., Ludwig, A., Valente, V. L., & Loreto, E. L. (2012). Mar, a MITE family of hAT  
546 transposons in *Drosophila*. *Mobile DNA*, 3(1), 13. [https://doi.org/10.1186/1759-](https://doi.org/10.1186/1759-8753-3-13)  
547 [8753-3-13](https://doi.org/10.1186/1759-8753-3-13)
- 548 Devos, Y., Meihls, L. N., Kiss, J., & Hibbard, B. E. (2013). Resistance evolution to the  
549 first generation of genetically modified *Diabrotica*-active *Bt*-maize events by  
550 western corn rootworm: Management and monitoring considerations. *Transgenic*  
551 *Research*, 22(2), 269–299. <https://doi.org/10.1007/s11248-012-9657-4>
- 552 Dolezel, J., Greilhuber, J., & Suda, J. (2007). *Flow Cytometry with Plant Cells: Analysis*

- 553            *of Genes, Chromosomes and Genomes* (p. 454).
- 554            <https://doi.org/10.1002/9783527610921>
- 555    Dubin, M. J., Mittelsten Scheid, O., & Becker, C. (2018). Transposons: A blessing curse.
- 556            *Current Opinion in Plant Biology*, 42, 23–29.
- 557            <https://doi.org/10.1016/j.pbi.2018.01.003>
- 558    Eben, A., & Espinosa de los Monteros, A. (2013). Tempo and mode of evolutionary
- 559            radiation in Diabroticina beetles (genera *Acalymma*, *Cerotoma*, and *Diabrotica*).
- 560            *ZooKeys*, 332, 207–321. <https://doi.org/10.3897/zookeys.332.5220>
- 561    Fabrick, J. A., Mathew, L. G., Tabashnik, B. E., & Li, X. (2011). Insertion of an intact
- 562            CR1 retrotransposon in a cadherin gene linked with Bt resistance in the pink
- 563            bollworm, *Pectinophora gossypiella*. *Insect Molecular Biology*, 20(5), 651–665.
- 564            <https://doi.org/10.1111/j.1365-2583.2011.01095.x>
- 565    Ferrari, J. A., & Rai, K. S. (1989). Phenotypic correlates of genome size variation in
- 566            *Aedes albopictus*. *Evolution; International Journal of Organic Evolution*, 43(4),
- 567            895–899. <https://doi.org/10.1111/j.1558-5646.1989.tb05187.x>
- 568    Feschotte, C. (2008). Transposable elements and the evolution of regulatory networks.
- 569            *Nature Reviews. Genetics*, 9(5), 397–405. <https://doi.org/10.1038/nrg2337>
- 570    Feschotte, C., Jiang, N., & Wessler, S. R. (2002). Plant transposable elements: Where
- 571            genetics meets genomics. *Nature Reviews Genetics*, 3(5), 329–341.
- 572            <https://doi.org/10.1038/nrg793>
- 573    Finnegan, D. J. (1989). Eukaryotic transposable elements and genome evolution.
- 574            *Trends in Genetics: TIG*, 5(4), 103–107. [https://doi.org/10.1016/0168-](https://doi.org/10.1016/0168-9525(89)90039-5)
- 575            [9525\(89\)90039-5](https://doi.org/10.1016/0168-9525(89)90039-5)

- 576 Finston, T. L., Hebert, P. D. N., & Footitt, R. B. (1995). Genome size variation in aphids.  
577 *Insect Biochemistry and Molecular Biology*, 25(2), 189–196.  
578 [https://doi.org/10.1016/0965-1748\(94\)00050-R](https://doi.org/10.1016/0965-1748(94)00050-R)
- 579 Flynn, J. M., Hubley, R., Goubert, C., Rosen, J., Clark, A. G., Feschotte, C., & Smit, A.  
580 F. (2019). *RepeatModeler2: Automated genomic discovery of transposable*  
581 *element families* [Preprint]. Genomics. <https://doi.org/10.1101/856591>
- 582 Fouché, S., Badet, T., Oggenfuss, U., Plissonneau, C., Francisco, C. S., & Croll, D.  
583 (2020). Stress-Driven Transposable Element De-repression Dynamics and  
584 Virulence Evolution in a Fungal Pathogen. *Molecular Biology and Evolution*,  
585 37(1), 221–239. <https://doi.org/10.1093/molbev/msz216>
- 586 Gahan, L. J. (2001). Identification of a gene associated with Bt resistance in *Heliothis*  
587 *virescens*. *Science*, 293(5531), 857–860.  
588 <https://doi.org/10.1126/science.1060949>
- 589 Gassmann, A. J., Petzold-Maxwell, J. L., Clifton, E. H., Dunbar, M. W., Hoffmann, A. M.,  
590 Ingber, D. A., & Keweshan, R. S. (2014). Field-evolved resistance by western  
591 corn rootworm to multiple *Bacillus thuringiensis* toxins in transgenic maize.  
592 *Proceedings of the National Academy of Sciences*, 111(14), 5141–5146.  
593 <https://doi.org/10.1073/pnas.1317179111>
- 594 Gilbert, C., Peccoud, J., & Cordaux, R. (2021). Transposable elements and the  
595 evolution of insects. *Annual Review of Entomology*, 66(1), 355–372.  
596 <https://doi.org/10.1146/annurev-ento-070720-074650>
- 597 Goubert, C., Modolo, L., Vieira, C., ValienteMoro, C., Mavingui, P., & Boulesteix, M.  
598 (2015). De novo assembly and annotation of the Asian tiger mosquito (*Aedes*

599 *albopictus*) repeatome with dnaPipeTE from raw genomic reads and comparative  
600 analysis with the yellow fever mosquito (*Aedes aegypti*). *Genome Biology and*  
601 *Evolution*, 7(4), 1192–1205. <https://doi.org/10.1093/gbe/evv050>

602 Grabherr, M. G., Haas, B. J., Yassour, M., Levin, J. Z., Thompson, D. A., Amit, I.,  
603 Adiconis, X., Fan, L., Raychowdhury, R., Zeng, Q., Chen, Z., Mauceli, E.,  
604 Hacohen, N., Gnirke, A., Rhind, N., di Palma, F., Birren, B. W., Nusbaum, C.,  
605 Lindblad-Toh, K., ... Regev, A. (2011). Full-length transcriptome assembly from  
606 RNA-seq data without a reference genome. *Nature Biotechnology*, 29(7), 644–  
607 652. <https://doi.org/10.1038/nbt.1883>

608 Gray, M. E., Sappington, T. W., Miller, N. J., Moeser, J., & Bohn, M. O. (2009).  
609 Adaptation and invasiveness of western corn rootworm: Intensifying research on  
610 a worsening pest. *Annual Review of Entomology*, 54(1), 303–321.  
611 <https://doi.org/10.1146/annurev.ento.54.110807.090434>

612 Green, P. (2002). Whole-genome disassembly. *Proceedings of the National Academy of*  
613 *Sciences of the United States of America*, 99(7), 4143–4144.  
614 <https://doi.org/10.1073/pnas.082095999>

615 Gregory, T. R. (2021). *Animal genome size database*. <http://www.genomesize.com/>

616 Gregory, T. R., Nedvěd, O., & Adamowicz, S. (2003). C-value estimates for 31 species  
617 of ladybird beetles (Coleoptera: Coccinellidae). *Hereditas*, 139, 121–127.  
618 <https://doi.org/10.1111/j.1601-5223.2003.01766.x>

619 Guo, L. T., Wang, S. L., Wu, Q. J., Zhou, X. G., Xie, W., & Zhang, Y. J. (2015). Flow  
620 cytometry and K-mer analysis estimates of the genome sizes of *Bemisia tabaci*  
621 B and Q (Hemiptera: Aleyrodidae). *Frontiers in Physiology*, 6.

- 622 <https://doi.org/10.3389/fphys.2015.00144>
- 623 Hanrahan, S. J., & Johnston, J. S. (2011). New genome size estimates of 134 species  
624 of arthropods. *Chromosome Research*, 19(6), 809–823.  
625 <https://doi.org/10.1007/s10577-011-9231-6>
- 626 Hare, E. E., & Johnston, J. S. (2012). Genome size determination using flow cytometry  
627 of propidium iodide-stained nuclei. In V. Orgogozo & M. V. Rockman (Eds.),  
628 *Molecular Methods for Evolutionary Genetics* (Vol. 772, pp. 3–12). Humana  
629 Press. [https://doi.org/10.1007/978-1-61779-228-1\\_1](https://doi.org/10.1007/978-1-61779-228-1_1)
- 630 He, K., Lin, K., Wang, G., & Li, F. (2016). Genome sizes of nine insect species  
631 determined by flow cytometry and k-mer analysis. *Frontiers in Physiology*, 7.  
632 <https://doi.org/10.3389/fphys.2016.00569>
- 633 Hidalgo, O., Pellicer, J., Christenhusz, M., Schneider, H., Leitch, A., & Leitch, I. (2017).  
634 Is there an upper limit to genome size? *Trends in Plant Science*, 22.  
635 <https://doi.org/10.1016/j.tplants.2017.04.005>
- 636 Jackson, D. M., Sorensen, K. A., Sorenson, C. E., & Story, R. N. (2005). Monitoring  
637 cucumber beetles in sweetpotato and cucurbits with kairomone-baited traps.  
638 *Journal of Economic Entomology*, 98(1), 12.
- 639 Jiang, N., Bao, Z., Zhang, X., Eddy, S. R., & Wessler, S. R. (2004). Pack-MULE  
640 transposable elements mediate gene evolution in plants. *Nature*, 431(7008),  
641 569–573. <https://doi.org/10.1038/nature02953>
- 642 Kapitonov, V. V., & Jurka, J. (2007). Helitrons on a roll: Eukaryotic rolling-circle  
643 transposons. *Trends in Genetics: TIG*, 23(10), 521–529.  
644 <https://doi.org/10.1016/j.tig.2007.08.004>

- 645 Kelley, J. L., Peyton, J. T., Fiston-Lavier, A.-S., Teets, N. M., Yee, M.-C., Johnston, J.  
646 S., Bustamante, C. D., Lee, R. E., & Denlinger, D. L. (2014). Compact genome of  
647 the Antarctic midge is likely an adaptation to an extreme environment. *Nature*  
648 *Communications*, 5(1), 4611. <https://doi.org/10.1038/ncomms5611>
- 649 Khajuria, C., Ivashuta, S., Wiggins, E., Flagel, L., Moar, W., Pleau, M., Miller, K., Zhang,  
650 Y., Ramaseshadri, P., Jiang, C., Hodge, T., Jensen, P., Chen, M., Gowda, A.,  
651 McNulty, B., Vazquez, C., Bolognesi, R., Haas, J., Head, G., & Clark, T. (2018).  
652 Development and characterization of the first dsRNA-resistant insect population  
653 from western corn rootworm, *Diabrotica virgifera virgifera* LeConte. *PLOS ONE*,  
654 13(5), e0197059. <https://doi.org/10.1371/journal.pone.0197059>
- 655 Kidwell, M. G. (2002). Transposable elements and the evolution of genome size in  
656 eukaryotes. *Genetica*, 115(1), 49–63. <https://doi.org/10.1023/a:1016072014259>
- 657 Klai, K., Chénais, B., Zidi, M., Djebbi, S., Caruso, A., Denis, F., Confais, J., Badawi, M.,  
658 Casse, N., & Mezghani Khemakhem, M. (2020). Screening of *Helicoverpa*  
659 *armigera* mobilome revealed transposable element insertions in insecticide  
660 resistance genes. *Insects*, 11(12), 879. <https://doi.org/10.3390/insects11120879>
- 661 Koch, R. L., Burkness, E. C., & Hutchison, W. D. (2004). Confirmation of bean leaf  
662 beetle, *Cerotoma trifurcata*, feeding on cucurbits. *Journal of Insect Science*, 4(1).  
663 <https://doi.org/10.1093/jis/4.1.5>
- 664 Kojima, K. K. (2019). Structural and sequence diversity of eukaryotic transposable  
665 elements. *Genes & Genetic Systems*, 94(6), 233–252.  
666 <https://doi.org/10.1266/ggs.18-00024>
- 667 Krysan, J. L. (1982). Diapause in the nearctic species of the *virgifera* group of

- 668            *Diabrotica*: Evidence for tropical origin and temperate adaptations. *Annals of the*  
669            *Entomological Society of America*, 75(2), 136–142.  
670            <https://doi.org/10.1093/aesa/75.2.136>
- 671 Krysan, J. L. (1986). Introduction: Biology, distribution, and identification of pest  
672            *Diabrotica*. In J. L. Krysan & T. A. Miller (Eds.), *Methods for the Study of Pest*  
673            *Diabrotica* (pp. 1–23). Springer. [https://doi.org/10.1007/978-1-4612-4868-2\\_1](https://doi.org/10.1007/978-1-4612-4868-2_1)
- 674 Krysan, J. L., Jackson, J. J., & Lew, A. C. (1984). Field Termination of Egg Diapause in  
675            *Diabrotica* with New Evidence of Extended Diapause in *D. barberi* (Coleoptera:  
676            Chrysomelidae). *Environmental Entomology*, 13(5), 1237–1240.  
677            <https://doi.org/10.1093/ee/13.5.1237>
- 678 Kuang, H., Padmanabhan, C., Li, F., Kamei, A., Bhaskar, P. B., Ouyang, S., Jiang, J.,  
679            Buell, C. R., & Baker, B. (2009). Identification of miniature inverted-repeat  
680            transposable elements (MITEs) and biogenesis of their siRNAs in the  
681            Solanaceae: New functional implications for MITEs. *Genome Research*, 19(1),  
682            42–56. <https://doi.org/10.1101/gr.078196.108>
- 683 Kumar, A., & Bennetzen, J. L. (1999). Plant retrotransposons. *Annual Review of*  
684            *Genetics*, 33, 479–532. <https://doi.org/10.1146/annurev.genet.33.1.479>
- 685 Levine, E., & Oloumi-Sadeghi, H. (1991). Management of Diabroticite Rootworms in  
686            Corn. *Annual Review of Entomology*, 36(1), 299-255.  
687            <https://doi.org/10.1146/annurev.en.36.010191.001305>
- 688 Lewis, P. A., Lampman, R. L., & Metcalf, R. L. (1990). Kairomonal attractants for  
689            *Acalymma vittatum* (Coleoptera: Chrysomelidae). *Environmental Entomology*,  
690            19(1), 8–14. <https://doi.org/10.1093/ee/19.1.8>



- 691 Liu, Y., Tahir ul Qamar, M., Feng, J.-W., Ding, Y., Wang, S., Wu, G., Ke, L., Xu, Q., &  
692 Chen, L.-L. (2019). Comparative analysis of miniature inverted-repeat  
693 transposable elements (MITEs) and long terminal repeat (LTR) retrotransposons  
694 in six *Citrus* species. *BMC Plant Biology*, 19(1), 140.  
695 <https://doi.org/10.1186/s12870-019-1757-3>
- 696 Lohe, A. R., & Hartl, D. L. (1996). Autoregulation of mariner transposase activity by  
697 overproduction and dominant-negative complementation. *Molecular Biology and*  
698 *Evolution*, 13(4), 549–555.  
699 <https://doi.org/10.1093/oxfordjournals.molbev.a025615>
- 700 Lower, S. S., Johnston, J. S., Stanger-Hall, K. F., Hjelman, C. E., Hanrahan, S. J.,  
701 Korunes, K., & Hall, D. (2017). Genome size in North American fireflies:  
702 Substantial variation likely driven by neutral processes. *Genome Biology and*  
703 *Evolution*, 9(6), 1499–1512. <https://doi.org/10.1093/gbe/evx097>
- 704 Lu, C., Chen, J., Zhang, Y., Hu, Q., Su, W., & Kuang, H. (2012). Miniature inverted-  
705 repeat transposable elements (MITEs) have been accumulated through  
706 amplification bursts and play important roles in gene expression and species  
707 diversity in *Oryza sativa*. *Molecular Biology and Evolution*, 29(3), 1005–1017.  
708 <https://doi.org/10.1093/molbev/msr282>
- 709 Lynch, M. (2007). *The origins of genome architecture*. Sinauer.
- 710 Mat Razali, N., Cheah, B. H., & Nadarajah, K. (2019). Transposable elements adaptive  
711 role in genome plasticity, pathogenicity and evolution in fungal phytopathogens.  
712 *International Journal of Molecular Sciences*, 20(14).  
713 <https://doi.org/10.3390/ijms20143597>



- 714 Matsubayashi, K. W., & Ohshima, I. (2015). Genome size increase in the phytophagous  
715 ladybird beetle *Henosepilachna vigintioctomaculata* species complex  
716 (Coleoptera: Coccinellidae): genome size increase in ladybird beetle.  
717 *Entomological Science*, 18(1), 134–137. <https://doi.org/10.1111/ens.12090>
- 718 Maumus, F., Fiston-Lavier, A.-S., & Quesneville, H. (2015). Impact of transposable  
719 elements on insect genomes and biology. *Current Opinion in Insect Science*, 7,  
720 30–36. <https://doi.org/10.1016/j.cois.2015.01.001>
- 721 Maupetit-Mehouas, S., & Vaury, C. (2020). Transposon Reactivation in the Germline  
722 May Be Useful for Both Transposons and Their Host Genomes. *Cells*, 9(5), 1172.  
723 <https://doi.org/10.3390/cells9051172>
- 724 McClintock, B. (1950). The origin and behavior of mutable loci in maize. *Proceedings of*  
725 *the National Academy of Sciences of the United States of America*, 36(6), 344–  
726 355. <https://doi.org/10.1073/pnas.36.6.344>
- 727 Meinke, L. J., Siegfried, B. D., Wright, R. J., & Chandler, L. D. (1998). Adult  
728 susceptibility of Nebraska western corn rootworm (Coleoptera: Chrysomelidae)  
729 populations to selected insecticides. *Journal of Economic Entomology*, 91(3),  
730 594–600. <https://doi.org/10.1093/jee/91.3.594>
- 731 Metcalf, R. L. (1986). Coevolutionary adaptations of rootworm beetles (Coleoptera:  
732 Chrysomelidae) to cucurbitacins. *Journal of Chemical Ecology*, 12(5), 1109–  
733 1124. <https://doi.org/10.1007/BF01638999>
- 734 Miller, N. J., Guillemaud, T., Giordano, R., Siegfried, B. D., Gray, M. E., Meinke, L. J., &  
735 Sappington, T. W. (2009). Genes, gene flow and adaptation of *Diabrotica*  
736 *virgifera virgifera*. *Agricultural and Forest Entomology*, 11(1), 47–60.

- 737 <https://doi.org/10.1111/j.1461-9563.2008.00398.x>
- 738 Miller, N. J., Richards, S., & Sappington, T. W. (2010). The prospects for sequencing  
739 the western corn rootworm genome. *Journal of Applied Entomology*, 134(5),  
740 420–428. <https://doi.org/10.1111/j.1439-0418.2009.01448.x>
- 741 Miller, N. J., & Zhao, Z. (2015). Transcriptional responses of *Diabrotica virgifera virgifera*  
742 larvae to benzoxazinoids. *Journal of Applied Entomology*, 139(6), 416–423.  
743 <https://doi.org/10.1111/jen.12193>
- 744 Nie, R., Andújar, C., Gómez-Rodríguez, C., Bai, M., Xue, H.-J., Tang, M., Yang, C.-T.,  
745 Tang, P., Yang, X.-K., & Vogler, A. P. (2020). The phylogeny of leaf beetles  
746 (Chrysomelidae) inferred from mitochondrial genomes. *Systematic Entomology*,  
747 45(1), 188–204. <https://doi.org/10.1111/syen.12387>
- 748 Oki, N., Yano, K., Okumoto, Y., Tsukiyama, T., Teraishi, M., & Tanisaka, T. (2008). A  
749 genome-wide view of miniature inverted-repeat transposable elements (MITEs)  
750 in rice, *Oryza sativa ssp.japonica*. *Genes & Genetic Systems*, 83(4), 321–329.  
751 <https://doi.org/10.1266/ggs.83.321>
- 752 Oliver, K. R., & Greene, W. K. (2009). Transposable elements: Powerful facilitators of  
753 evolution. *BioEssays: News and Reviews in Molecular, Cellular and*  
754 *Developmental Biology*, 31(7), 703–714. <https://doi.org/10.1002/bies.200800219>
- 755 O’Neal, M., Difonzo, C. D., Landis, D., & Meek, D. (2002). Monitoring *Diabrotica*  
756 *virgifera virgifera* (LeConte) in Michigan soybean fields and subsequent adult  
757 emergence in rotated and continuous cornfields. *Great Lakes Entomologist*, 35,  
758 173–181.
- 759 Osanai-Futahashi, M., Suetsugu, Y., Mita, K., & Fujiwara, H. (2008). Genome-wide

- 760 screening and characterization of transposable elements and their distribution  
761 analysis in the silkworm, *Bombyx mori*. *Insect Biochemistry and Molecular*  
762 *Biology*, 38(12), 1046–1057. <https://doi.org/10.1016/j.ibmb.2008.05.012>
- 763 Palmer, M., & Petitpierre, E. (1996). Relationship of genome size to body size in *Phylan*  
764 *semicostatus*(Coleoptera: Tenebrionidae). *Annals of the Entomological Society of*  
765 *America*, 89(2), 221–225. <https://doi.org/10.1093/aesa/89.2.221>
- 766 Palmer, M., Petitpierre, E., & Pons, J. (2003). Test of the correlation between body size  
767 and DNA content in *Pimelia* (Coleoptera: Tenebrionidae) from the Canary  
768 islands. *European Journal of Entomology*, 100, 123–129.  
769 <https://doi.org/10.14411/eje.2003.022>
- 770 Pereira, A. E., Wang, H., Zukoff, S. N., Meinke, L. J., French, B. W., & Siegfried, B. D.  
771 (2015). Evidence of field-evolved resistance to bifenthrin in western corn  
772 rootworm (*Diabrotica virgifera virgifera* LeConte) populations in western  
773 Nebraska and Kansas. *PLOS ONE*, 10(11), e0142299.  
774 <https://doi.org/10.1371/journal.pone.0142299>
- 775 Petitpierre, E., Segarra, C., & Juan, C. (1993). Genome Size and Chromosomal  
776 Evolution in Leaf Beetles (Coleoptera, Chrysomelidae). *Hereditas*, 119(1), 1–6.  
777 <https://doi.org/10.1111/j.1601-5223.1993.00001.x>
- 778 Pombert, J.-F. (2021). *PombertLab/SSRG: SSRG-v2.0.1*. Zenodo.  
779 <https://doi.org/10.5281/zenodo.5532794>
- 780 R Core Team (2021). R: A language and environment for statistical computing. R  
781 Foundation for Statistical Computing, Vienna, Austria. <http://www.R-project.org/>
- 782 Rehm, S., & Wessels, J. H. (1957). Bitter principles of the cucurbitaceae. VIII.—

- 783 Cucurbitacins in seedlings—Occurrence, biochemistry and genetical aspects.  
784 *Journal of the Science of Food and Agriculture*, 8(12), 687–691.  
785 <https://doi.org/10.1002/jsfa.2740081204>
- 786 Reid, C. A. M. (1995). A cladistic analysis of subfamilial relationships in the  
787 Chrysomelidae sensu lato (Chrysomeloidea). In: Pakaluk J. & Slipinski S.A.  
788 (eds): *Biology, Phylogeny, and Classification of Coleoptera: Papers Celebrating*  
789 *the 80th Birthday of Roy A. Crowson*. Muzeum i Instytut Zoologii PAN,  
790 Warszawa. 2, 559-631.
- 791 Robert, C. A., Veyrat, N., Glauser, G., Marti, G., Doyen, G. R., Villard, N., Gaillard, M.  
792 D. P., Köllner, T. G., Giron, D., Body, M., Babst, B. A., Ferrieri, R. A., Turlings, T.  
793 C. J., & Erb, M. (2012). A specialist root herbivore exploits defensive metabolites  
794 to locate nutritious tissues: A root herbivore exploits plant defences. *Ecology*  
795 *Letters*, 15(1), 55–64. <https://doi.org/10.1111/j.1461-0248.2011.01708.x>
- 796 Robert, C. A., Zhang, X., Machado, R. A., Schirmer, S., Lori, M., Mateo, P., Erb, M., &  
797 Gershenson, J. (2017). Sequestration and activation of plant toxins protect the  
798 western corn rootworm from enemies at multiple trophic levels. *ELife*, 6, e29307.  
799 <https://doi.org/10.7554/eLife.29307>
- 800 Rostant, W. G., Wedell, N., & Hosken, D. J. (2012). Transposable elements and  
801 insecticide resistance. In *Advances in Genetics* (Vol. 78, pp. 169–201). Elsevier.  
802 <https://doi.org/10.1016/B978-0-12-394394-1.00002-X>
- 803 Russell, S. J., & LaMarre, J. (2018). Transposons and the PIWI pathway: Genome  
804 defense in gametes and embryos. *Reproduction*, 156(4), R111–R124.  
805 <https://doi.org/10.1530/REP-18-0218>

- 806 Saha, A., Mitchell, J. A., Nishida, Y., Hildreth, J. E., Ariberre, J. A., Gilbert, W. V., &  
807 Garfinkel, D. J. (2015). A trans-Dominant Form of Gag Restricts Ty1  
808 Retrotransposition and Mediates Copy Number Control. *Journal of Virology*,  
809 89(7), 3922–3938. <https://doi.org/10.1128/JVI.03060-14>
- 810 Santiago, N., Herráiz, C., Goñi, J. R., Messeguer, X., & Casacuberta, J. M. (2002).  
811 Genome-wide analysis of the *Emigrant* family of MITEs of *Arabidopsis thaliana*.  
812 *Molecular Biology and Evolution*, 19(12), 2285–2293.  
813 <https://doi.org/10.1093/oxfordjournals.molbev.a004052>
- 814 Sappington, T. W., Siegfried, B. D., & Guillemaud, T. (2006). Coordinated *Diabrotica*  
815 genetics research: Accelerating progress on an urgent insect pest problem.  
816 *American Entomologist*, 52(2), 90–97. <https://doi.org/10.1093/ae/52.2.90>
- 817 Sasai, H., Ishida, M., Murakami, K., Tadokoro, N., Ishihara, A., Nishida, R., & Mori, N.  
818 (2009). Species-Specific Glucosylation of DIMBOA in Larvae of the Rice  
819 Armyworm. *Bioscience, Biotechnology, and Biochemistry*, 73(6), 1333–1338.  
820 <https://doi.org/10.1271/bbb.80903>
- 821 Schoville, S. D., Chen, Y. H., Andersson, M. N., Benoit, J. B., Bhandari, A., Bowsher, J.  
822 H., Brevik, K., Cappelle, K., Chen, M.-J. M., Childers, A. K., Childers, C.,  
823 Christiaens, O., Clements, J., Didion, E. M., Elpidina, E. N., Engsontia, P.,  
824 Friedrich, M., García-Robles, I., Gibbs, R. A., ... Richards, S. (2018). A model  
825 species for agricultural pest genomics: The genome of the Colorado potato  
826 beetle, *Leptinotarsa decemlineata* (Coleoptera: Chrysomelidae). *Scientific*  
827 *Reports*, 8(1), 1931. <https://doi.org/10.1038/s41598-018-20154-1>
- 828 Smit, A. F. A., Hubley, R., & Green, P. (1996). Repeat-Masker open-3.0.

- 829 [Http://Www.Repeatmasker.Org](http://www.Repeatmasker.Org). <https://ci.nii.ac.jp/naid/10029514778/>
- 830 Souza, D., Peterson, J. A., Wright, R. J., & Meinke, L. J. (2020). Field efficacy of soil  
831 insecticides on pyrethroid-resistant western corn rootworms (*Diabrotica virgifera*  
832 *virgifera* LeConte). *Pest Management Science*, 76(2), 827–833.  
833 <https://doi.org/10.1002/ps.5586>
- 834 Souza, D., Vieira, B. C., Fritz, B. K., Hoffmann, W. C., Peterson, J. A., Kruger, G. R., &  
835 Meinke, L. J. (2019). Western corn rootworm pyrethroid resistance confirmed by  
836 aerial application simulations of commercial insecticides. *Scientific Reports*, 9(1),  
837 6713. <https://doi.org/10.1038/s41598-019-43202-w>
- 838 Stuart, T., Eichten, S. R., Cahn, J., Karpievitch, Y. V., Borevitz, J. O., & Lister, R.  
839 (2016). Population scale mapping of transposable element diversity reveals links  
840 to gene regulation and epigenomic variation. *ELife*, 5, e20777.  
841 <https://doi.org/10.7554/eLife.20777>
- 842 Talla, V., Suh, A., Kalsoom, F., Dincă, V., Vila, R., Friberg, M., Wiklund, C., &  
843 Backström, N. (2017). Rapid increase in genome size as a consequence of  
844 transposable element hyperactivity in wood-white (*Leptidea*) butterflies. *Genome*  
845 *Biology and Evolution*, 9(10), 2491–2505. <https://doi.org/10.1093/gbe/evx163>
- 846 Tallamy, D. W., Whittington, D. P., Defurio, F., Fontaine, D. A., Gorski, P. M., & Gothro,  
847 P. W. (1998). Sequestered Cucurbitacins and Pathogenicity of *Metarhizium*  
848 *anisopliae* (Moniliales: Moniliaceae) on Spotted Cucumber Beetle Eggs and  
849 Larvae (Coleoptera: Chrysomelidae). *Environmental Entomology*, 27(2), 366–  
850 372. <https://doi.org/10.1093/ee/27.2.366>
- 851 Thomas-Bulle, C., Piednoël, M., Donnart, T., Filée, J., Jollivet, D., & Bonnivard, É.

- 852 (2018). Mollusc genomes reveal variability in patterns of LTR-retrotransposons  
853 dynamics. *BMC Genomics*, *19*(1), 821. [https://doi.org/10.1186/s12864-018-5200-](https://doi.org/10.1186/s12864-018-5200-1)  
854 1
- 855 Toepfer, S., Haye, T., Erlandson, M., Goettel, M., Lundgren, J. G., Kleespies, R. G.,  
856 Weber, D. C., Walsh, G. C., Peters, A., Ehlers, R.-U., Strasser, H., Moore, D.,  
857 Keller, S., Vidal, S., & Kuhlmann, U. (2009). A review of the natural enemies of  
858 beetles in the subtribe Diabroticina (Coleoptera: Chrysomelidae): implications for  
859 sustainable pest management. *Biocontrol Science and Technology*, *19*(1), 1–65.  
860 <https://doi.org/10.1080/09583150802524727>
- 861 Tomaszewska, P., Pellny, T. K., Hernández, L. M., Mitchell, R. A. C., Castiblanco, V.,  
862 Vega, J. J. de, Schwarzacher, T., & Heslop-Harrison, P. (J S. ). (2021). Flow  
863 cytometry-based determination of ploidy from dried leaf specimens in  
864 genomically complex collections of the tropical forage grass *Urochloa* s. L.  
865 *BioRxiv*, 2021.03.26.437252. <https://doi.org/10.1101/2021.03.26.437252>
- 866 Voronova, A., Belevich, V., Jansons, A., & Rungis, D. (2014). Stress-induced  
867 transcriptional activation of retrotransposon-like sequences in the Scots pine  
868 (*Pinus sylvestris* L.) genome. *Tree Genetics & Genomes*, *10*(4), 937–951.  
869 <https://doi.org/10.1007/s11295-014-0733-1>
- 870 Wang, L., Wang, J., Ma, Y., Wan, P., Liu, K., Cong, S., Xiao, Y., Xu, D., Wu, K., Fabrick,  
871 J. A., Li, X., & Tabashnik, B. E. (2019). Transposon insertion causes cadherin  
872 mis-splicing and confers resistance to Bt cotton in pink bollworm from China.  
873 *Scientific Reports*, *9*(1), 7479. <https://doi.org/10.1038/s41598-019-43889-x>
- 874 Wang, S., Lorenzen, M. D., Beeman, R. W., & Brown, S. J. (2008). Analysis of repetitive



875 DNA distribution patterns in the *Tribolium castaneum* genome. *Genome Biology*,  
876 9(3), R61. <https://doi.org/10.1186/gb-2008-9-3-r61>

877 Wang, X., Fang, X., Yang, P., Jiang, X., Jiang, F., Zhao, D., Li, B., Cui, F., Wei, J., Ma,  
878 C., Wang, Y., He, J., Luo, Y., Wang, Z., Guo, X., Guo, W., Wang, X., Zhang, Y.,  
879 Yang, M., ... Kang, L. (2014). The locust genome provides insight into swarm  
880 formation and long-distance flight. *Nature Communications*, 5(1), 2957.  
881 <https://doi.org/10.1038/ncomms3957>

882 Wang, X., Xu, Y., Zhang, S., Cao, L., Huang, Y., Cheng, J., Wu, G., Tian, S., Chen, C.,  
883 Liu, Y., Yu, H., Yang, X., Lan, H., Wang, N., Wang, L., Xu, J., Jiang, X., Xie, Z.,  
884 Tan, M., ... Xu, Q. (2017). Genomic analyses of primitive, wild and cultivated  
885 citrus provide insights into asexual reproduction. *Nature Genetics*, 49(5), 765–  
886 772. <https://doi.org/10.1038/ng.3839>

887 Weinstock, G. M., Robinson, G. E., Gibbs, R. A., Weinstock, G. M., Weinstock, G. M.,  
888 Robinson, G. E., Worley, K. C., Evans, J. D., Maleszka, R., Robertson, H. M.,  
889 Weaver, D. B., Beye, M., Bork, P., Elisk, C. G., Evans, J. D., Hartfelder, K., Hunt,  
890 G. J., Robertson, H. M., Robinson, G. E., ... Genome assembly: (2006). Insights  
891 into social insects from the genome of the honeybee *Apis mellifera*. *Nature*,  
892 443(7114), 931–949. <https://doi.org/10.1038/nature05260>

893 Wendel, J. F., & Wessler, S. R. (2000). Retrotransposon-mediated genome evolution on  
894 a local ecological scale. *Proceedings of the National Academy of Sciences*,  
895 97(12), 6250–6252. <https://doi.org/10.1073/pnas.97.12.6250>

896 Wessler, S. R., Bureau, T. E., & White, S. E. (1995). LTR-retrotransposons and MITEs:  
897 Important players in the evolution of plant genomes. *Current Opinion in Genetics*



898            & *Development*, 5(6), 814–821. [https://doi.org/10.1016/0959-437x\(95\)80016-x](https://doi.org/10.1016/0959-437x(95)80016-x)

899 Wicker, T., Sabot, F., Hua-Van, A., Bennetzen, J. L., Capy, P., Chalhoub, B., Flavell, A.,

900            Leroy, P., Morgante, M., Panaud, O., Paux, E., SanMiguel, P., & Schulman, A. H.

901            (2007). A unified classification system for eukaryotic transposable elements.

902            *Nature Reviews Genetics*, 8(12), 973–982. <https://doi.org/10.1038/nrg2165>

903 Yan, H., Bombarely, A., & Li, S. (2020). *DeepTE: A computational method for de novo*

904            *classification of transposons with convolutional neural network* [Preprint].

905            Bioinformatics. <https://doi.org/10.1101/2020.01.27.921874>

906 Zhang, S., Gu, S., Ni, X., & Li, X. (2019). Genome size reversely correlates with host

907            plant range in *Helicoverpa* species. *Frontiers in Physiology*, 10, 29.

908            <https://doi.org/10.3389/fphys.2019.00029>

909
